# Supplementary material
Source: PubMed Central journal article supplement (PMC6625865)
Supplement: NIHMS1527483-supplement-1.pdf [file NIHMS1527483-supplement-1.pdf]

**Supplemental Table 1. Antibody list.**

| <b><i>Primary antibody</i></b>     | <b>Brand</b>           | <b>Dilution (IF)</b> | <b>Dilution (WB)</b> | <b>Size (kDa)</b> |
|------------------------------------|------------------------|----------------------|----------------------|-------------------|
| chicken anti-VIM                   | Millipore              | 1:1,000              | 1:1,000              | 54                |
| mouse anti-FBLN5                   | Abcam                  | 1:100                | 1:1,000              | 50                |
| mouse anti-ABCA1                   | Abcam                  |                      | 1:200                | 254               |
| mouse anti- $\beta$ -actin         | Sigma                  |                      | 1:50,000             | 42                |
| <b><i>Secondary antibody</i></b>   |                        |                      |                      |                   |
| donkey anti-chicken Alexafluor 488 | Jackson ImmunoResearch | 1:1,000              |                      |                   |
| goat anti-mouse Alexafluor 594     | Jackson ImmunoResearch | 1:1,000              |                      |                   |
| donkey anti-chicken HRP conjugate  | Jackson ImmunoResearch |                      | 1:5,000              |                   |
| goat anti-mouse HRP conjugate      | Jackson ImmunoResearch |                      | 1:5,000              |                   |

IF: immunofluorescence, WB: western blotting.

**Supplemental Table 2. Primer list.**

| Gene                                    | Primer                    | Length (bp) |
|-----------------------------------------|---------------------------|-------------|
| <i>hABCA1</i> - Forward                 | TTCGCCCGTTCACTG           | 96          |
| <i>hABCA1</i> - Reverse                 | TGCCATCCATCCCAC           |             |
| <i>mABCA1</i> - Forward                 | CCACCCTACGAACAACA         | 183         |
| <i>mABCA1</i> - Reverse                 | TGAGAACAGGCGAGACA         |             |
| <i>ov/bABCA1</i> - Forward              | GCCTTCAATGAGACTAACCG      | 95          |
| <i>ov/bABCA1</i> - Reverse              | AGAACCTCTGTCTGCTACTGG     |             |
| <i>pABCA1</i> - Forward                 | TCCCAGCGAGACGAAACA        | 141         |
| <i>pABCA1</i> - Reverse                 | CCTTGCCGTCCATACCG         |             |
| <i>CREB1</i> - Forward                  | ACTCAGCCAGGCACTACCA       | 170         |
| <i>CREB1</i> - Reverse                  | GAAGACGCCATAACAACCC       |             |
| <i>CYP11A1</i> - Forward                | ACCCATCGGAGTCCTGTTTAA     | 84          |
| <i>CYP11A1</i> - Reverse                | GCCTCTGGAGCCATCACCT       |             |
| <i>HSD3B1</i> - Forward                 | CTTGCCGAGAAGGCTGTG        | 161         |
| <i>HSD3B1</i> - Reverse                 | TTGGTCAGGATGCCGTTG        |             |
| <i>HSD17B1</i> - Forward                | TCGGGACGCATATTGGTG        | 262         |
| <i>HSD17B1</i> - Reverse                | GGCGACAGTAGCGGTAGAA       |             |
| <i>HSL</i> - Forward                    | CCTCCTCGTGGCTCAACTCCT     | 85          |
| <i>HSL</i> - Reverse                    | CGCCGCATTGGCTCTGTCTT      |             |
| <i>h/pGAPDH</i> - Forward               | GGGAAGCTCACTGGCATGGCCTTCC | 119         |
| <i>h/pGAPDH</i> - Reverse               | GCCTGCTTCACCACCTTCTTG     |             |
| <i>mGAPDH</i> - Forward                 | CGGCAAATCAACGGCACA        | 84          |
| <i>mGAPDH</i> - Reverse                 | TCTCGCTCCTGGAAGATGG       |             |
| <i>ov/bGAPDH</i> - Forward              | TTCCACGGCACAGTCAA         | 241         |
| <i>ov/bGAPDH</i> - Reverse              | TCACGCCCATCACAAAC         |             |
| <i>LDLR</i> - Forward                   | TCGCCTACCTCTTCTTCACCAA    | 107         |
| <i>LDLR</i> - Reverse                   | GTCCAGGGCAACCACATTCTT     |             |
| <i>LXR<math>\alpha</math></i> - Forward | GAGGTACAACCCTGGAAGTGAGA   | 88          |
| <i>LXR<math>\alpha</math></i> - Reverse | ATCAGTCGGTCCCTGCTTTGG     |             |
| <i>LXR<math>\beta</math></i> - Forward  | CAGATCGCCCTCCTGAAAGCC     | 183         |
| <i>LXR<math>\beta</math></i> - Reverse  | CATGGCCCGTGAGAACTCGA      |             |
| <i>RPL27</i> - Forward                  | CGCAAGGCCCGACGAGAGGC      | 93          |
| <i>RPL27</i> - Reverse                  | GACCTAAAACCGCAGCTTCTGG    |             |
| <i>RXR<math>\alpha</math></i> - Forward | TCCTTAGCGATGCCTTAGCCG     | 90          |
| <i>RXR<math>\alpha</math></i> - Reverse | ACCTTTCCCGACGCTTTAGACG    |             |
| <i>RXR<math>\beta</math></i> - Forward  | AGCAGCCCAAATGACCC         | 83          |
| <i>RXR<math>\beta</math></i> - Reverse  | ATCCTCTTCGCCCACTCA        |             |
| <i>hStAR</i> - Forward                  | GCTCAGGAAGGACGAAG         | 91          |
| <i>hStAR</i> - Reverse                  | CAAATGTGGCAGTGGTG         |             |
| <i>mStAR</i> - Forward                  | GGGCATACTCAACAACC         | 86          |
| <i>mStAR</i> - Reverse                  | CATCTGGCACCATCTTAC        |             |
| <i>ov/bStAR</i> - Forward               | CCCTGGGCATCCTCAAAGA       | 115         |
| <i>ov/bStAR</i> - Reverse               | ACCTCCAACCGGAACACCTT      |             |

|                         |                          |     |
|-------------------------|--------------------------|-----|
| <i>pStAR</i> - Forward  | AAGCTCAGCCCGCCACT        | 120 |
| <i>pStAR</i> - Reverse  | ACACCACTGCAACATCCCAC     |     |
| <i>SREBF1</i> - Forward | TACATCCGCTTCCTTCAGCACAG  | 183 |
| <i>SREBF1</i> - Reverse | TCCACCACCTCGGGCTTCAT     |     |
| <i>SR-B1</i> - Forward  | GCCGCTAATGTGGTTCG        | 125 |
| <i>SR-B1</i> - Reverse  | TGTGATGTGAGCAGGAAGC      |     |
| <i>TSPO</i> - Forward   | GCCTTCGTGGATCTCCTGCTGA   | 88  |
| <i>TSPO</i> - Reverse   | TCCTGCCACATACGGTAGTTGAGC |     |

Unless specified, all primer sequences are designed against the sheep genome sequence. b: bovine, h: human, m: mouse, p: porcine, ov: ovine.

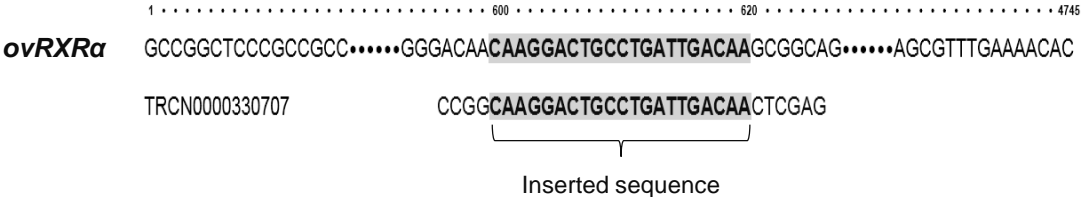

**Supplemental Figure 1.** Sequence map for *RXRα* knockdown. *Top:* ovine *RXRα* sequence. *Bottom:* *RXRα* shRNA insert

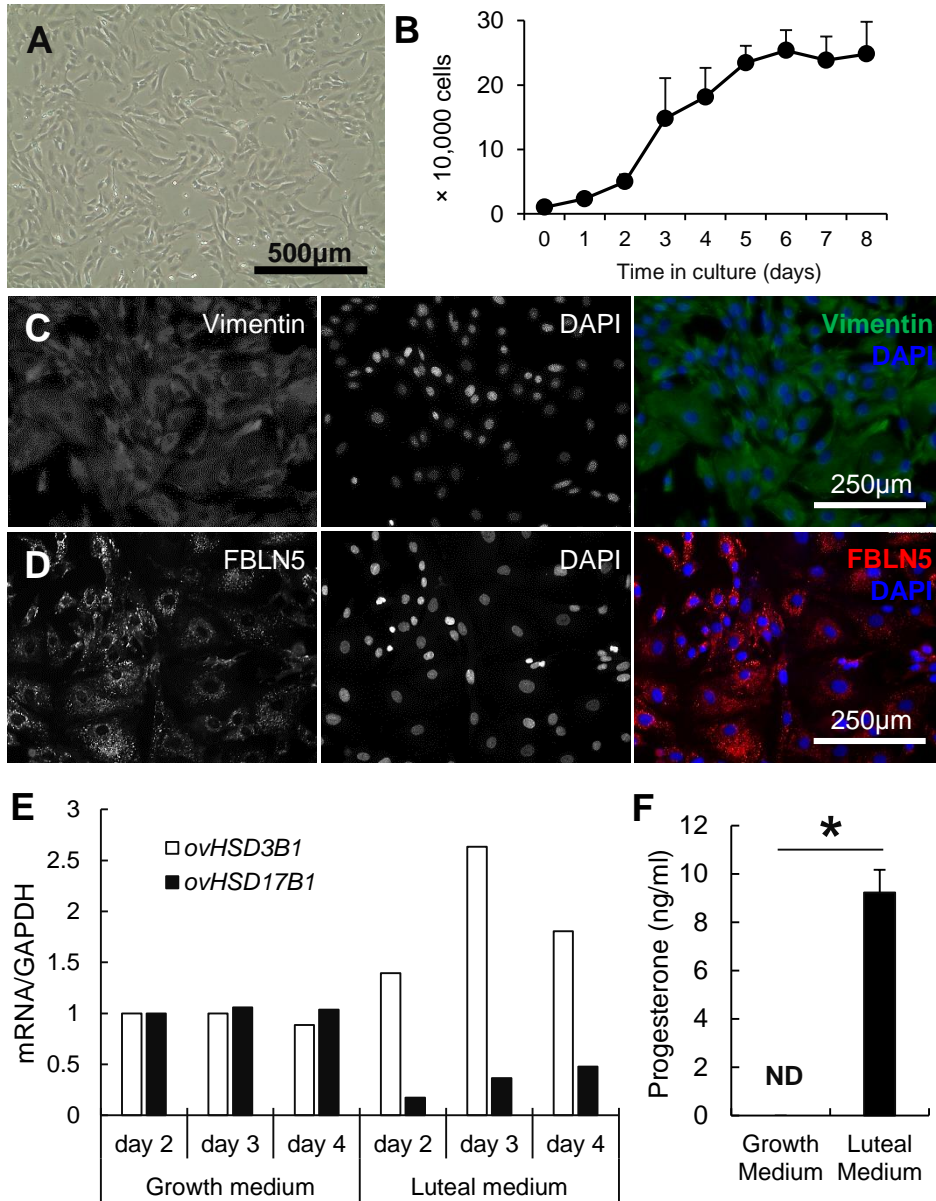

**Supplemental Figure 2.** Identification of primary cultured ovine ovarian theca cells. Morphology (A), growth curve (B) of primary cultured ovine theca cells over 8 days. Immunofluorescence stain of theca cell positive marker vimentin (VIM) (C) and fibulin 5 (FBLN5) (D). Dynamic expression pattern of steroidogenic enzymes (*ovHSD3B1* and *ovHSD17B1*) (E) and progesterone production (F) in ovine ovarian theca cells before (growth medium) and after luteinization (luteal medium). \* denote differences among treatments ( $P < 0.05$ ). N = 3 cultured cell lines per group. ND means not detectable.

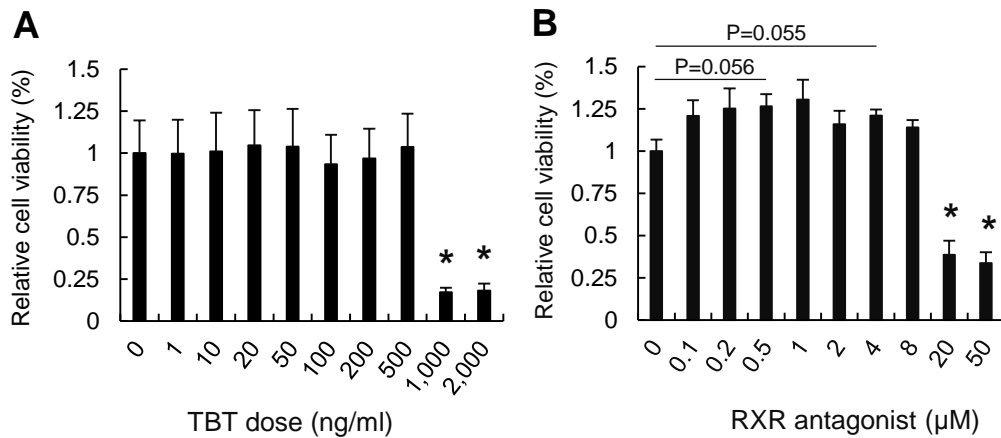

**Supplemental Figure 3.** Cytotoxicity effects of TBT (A) and RXR antagonist, UVI3003 (B) on primary ovine ovarian theca cells upon three days exposure using an MTT assay. Asterisks denote differences among treatments ( $P < 0.05$ ).  $N = 3$  cultured cell lines per group.

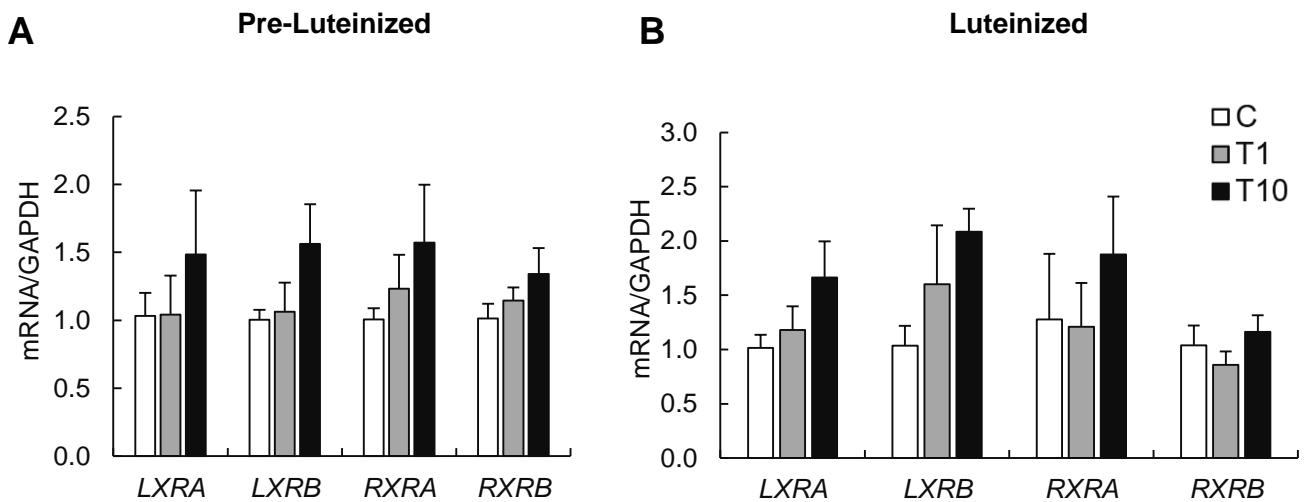

**Supplemental Figure 4.** Effect of TBT exposure on mRNA expression in pre-luteinized and luteinized ovine primary theca cells. mRNA expression (mean  $\pm$  SEM) of nuclear receptors (*LXR $\alpha$* , *LXR $\beta$* , *RXR $\alpha$* , *RXR $\beta$* ) in primary ovine pre-luteinized (**A**) and luteinized (**B**) ovine primary theca cells exposed to 1 ng/ml TBT (T1; gray bars), 10 ng/ml TBT (T10; closed bars) or vehicle (C; control group; open bars). \* denote differences among treatments ( $P < 0.05$ ). N=3 primary cultured cell lines per group.

## Supplemental Figure 5

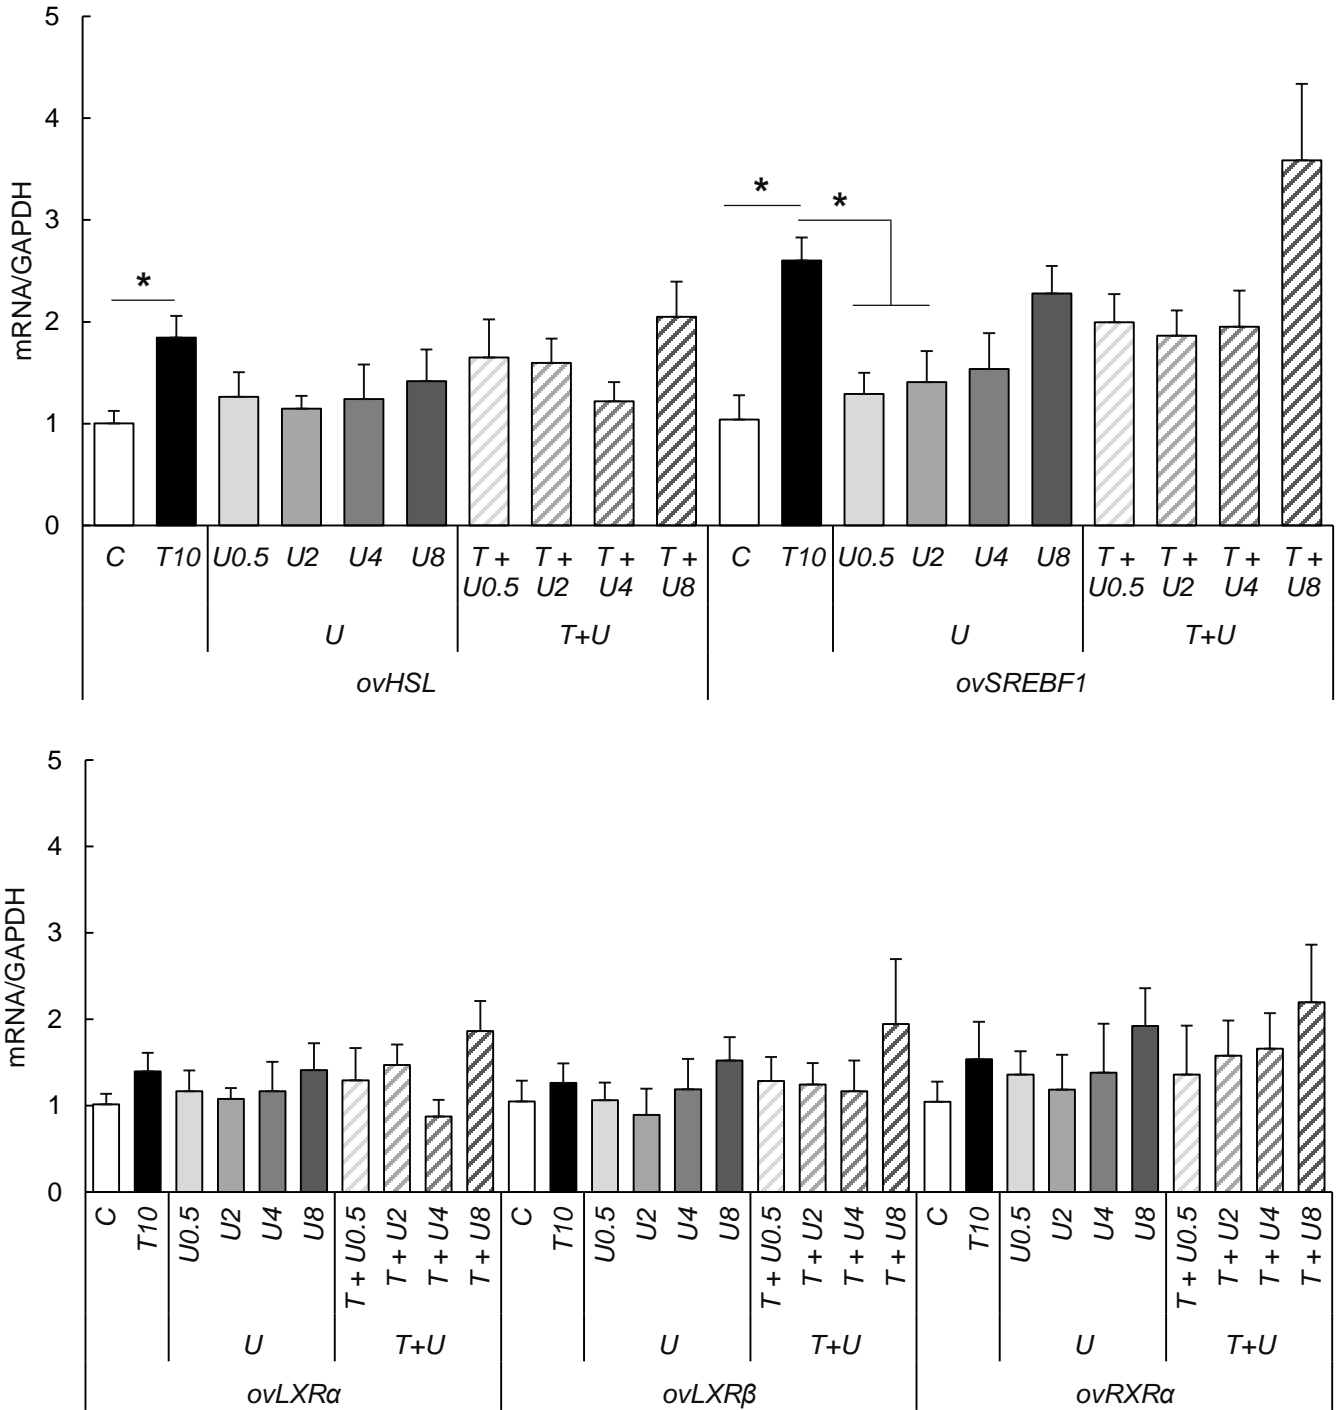

**Supplemental Figure 5.** Effect of TBT (0 and 10 ng/ml) and/or RXR antagonist (UVI3003; 0.5, 2, 4 and 8  $\mu$ M) exposure on mRNA (*ovHSL*, *ovSREBF1*, *ovLXR $\alpha$* , *ovLXR $\beta$*  and *ovRXR $\alpha$* ) expression (mean  $\pm$  SEM) in pre-luteinized ovine primary theca cells. Asterisks denote differences among treatments (P<0.05). N=3 cultured cell lines per group. U: UVI3003 ( $\mu$ M). T: TBT.
